# Supplementary material for: Enhancing Immune Responses to Cancer Vaccines Using Multi-Site Injections
Source: PubMed Central journal article supplement (PMC5559552; doi:10.1038/s41598-017-08665-9), 2017-08-16
Supplement: 41598_2017_8665_MOESM1_ESM.pdf [file 41598_2017_8665_MOESM1_ESM.pdf]

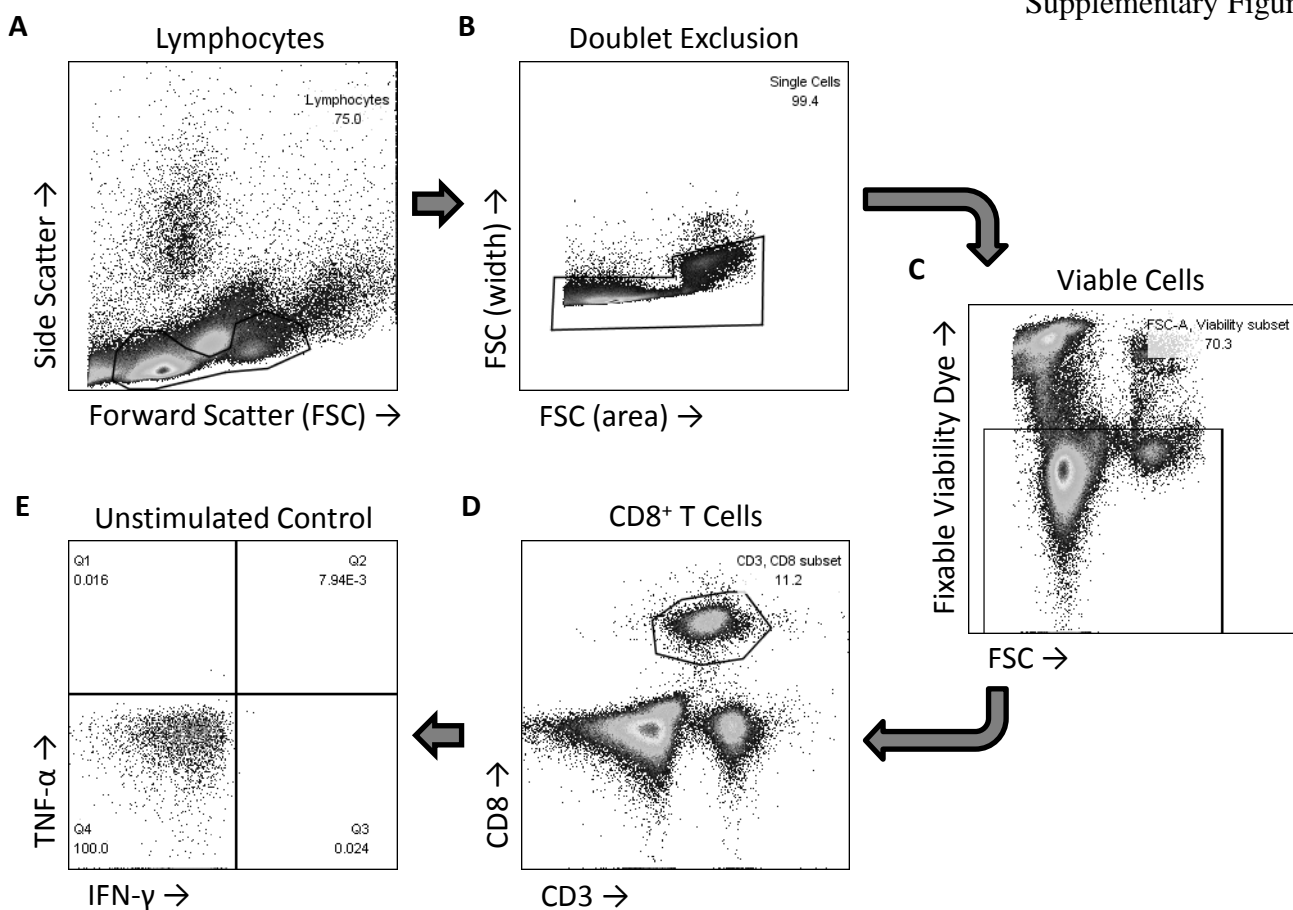

**Supplementary Figure 1: Gating strategy for flow cytometric assessment of antigen-specific CD8<sup>+</sup> T cells.** Blood (shown), spleens or lymph nodes from vaccinated or unvaccinated mice were used to assess T cell responses. Erythrocyte-free single-cell suspensions were re-stimulated with peptides representing the immunodominant epitopes of the target antigen. Cells had Fc receptors blocked and were then stained for surface markers and intracellular interferon (IFN)- $\gamma$  and tumour necrosis factor (TNF)- $\alpha$ . (A) Lymphocytes were gated based on their physical characteristics on a forward scatter (FSC; area) versus side scatter (area) plot. (B) Singlet lymphocytes were then identified on a FSC (area) versus FSC (width) plot. (C) Viable singlet lymphocytes were selected by excluding those that stained with a fixable viability stain. (D) Viable CD3<sup>+</sup>CD8<sup>+</sup> T cells were subsequently selected for analysis of (E) intracellular cytokine staining to quantify those that were specific for the target peptide (*i.e.* quadrant #2 + quadrant #3). In this example, an typical unstimulated control is shown, for which the background staining of Q2+Q3 was always <0.05%. T cell responses were calculated as: (Q2+Q3 [stimulated]) - (Q2+Q3 [unstimulated]).

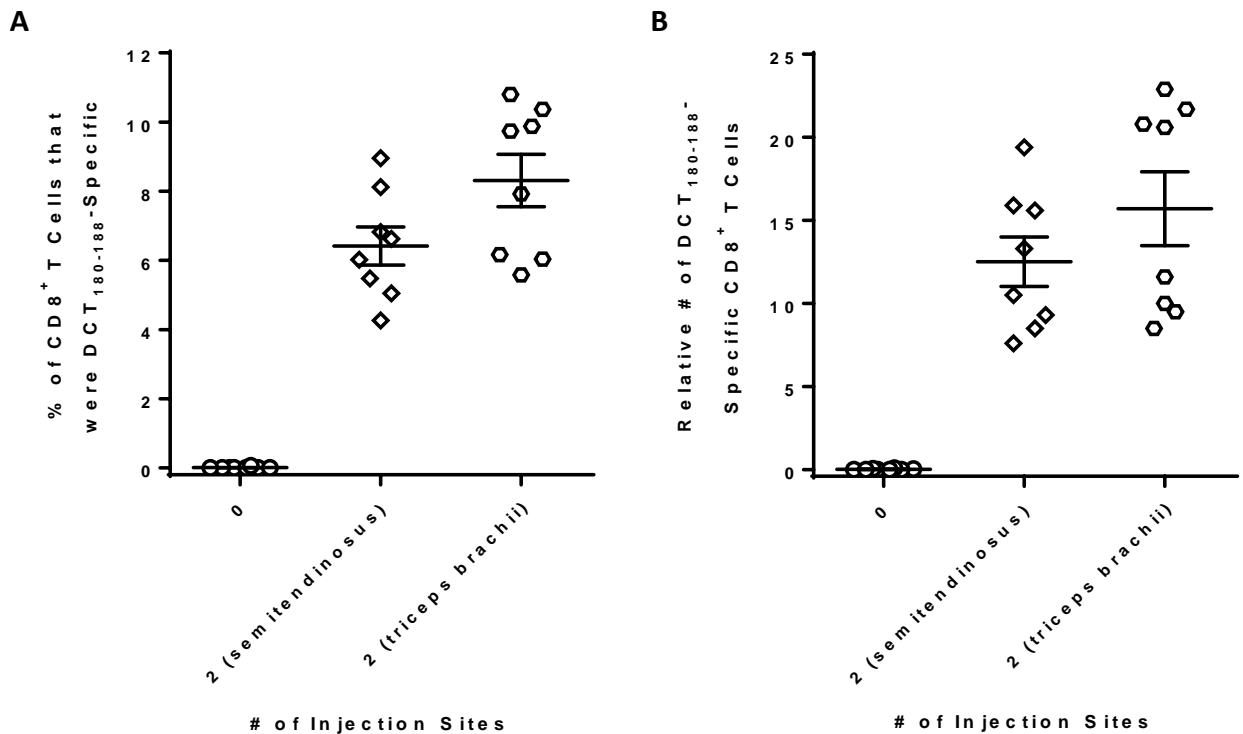

**Supplementary Figure 2: Targeting lymphatic regions draining the hamstrings versus triceps brachii with multi-site vaccinations does not alter the magnitude of antigen-specific CD8<sup>+</sup> T cell responses.** Tumor-free C57BL/6 mice (n = 8 per group; pooled from two experimental replicates) were either unvaccinated (0 injection sites) or vaccinated with a total of  $1 \times 10^8$  pfu of a recombinant human serotype 5 adenovirus expressing the melanoma-associated antigen dopachrome tautomerase, with injections spread across two sites (*i.e.* the semitendinosus of both hind limbs versus the triceps brachii of both forelimbs). Fourteen days post-immunization blood-derived DCT<sub>180-188</sub>-specific CD8<sup>+</sup> T cells were quantified by flow cytometric detection of intracellular cytokines following *ex vivo* re-stimulation with peptides. The (A) frequency and (B) relative number (normalized based on blood volume) of DCT-specific T cells were assessed by one-way analysis of variance with Tukey's multiple comparison test. Means and standard errors are shown. The anatomical location (*i.e.* hind limbs versus forelimbs) of the multi-site injections did not significantly influence the magnitude of the T cell response ( $p > 0.05$ ).

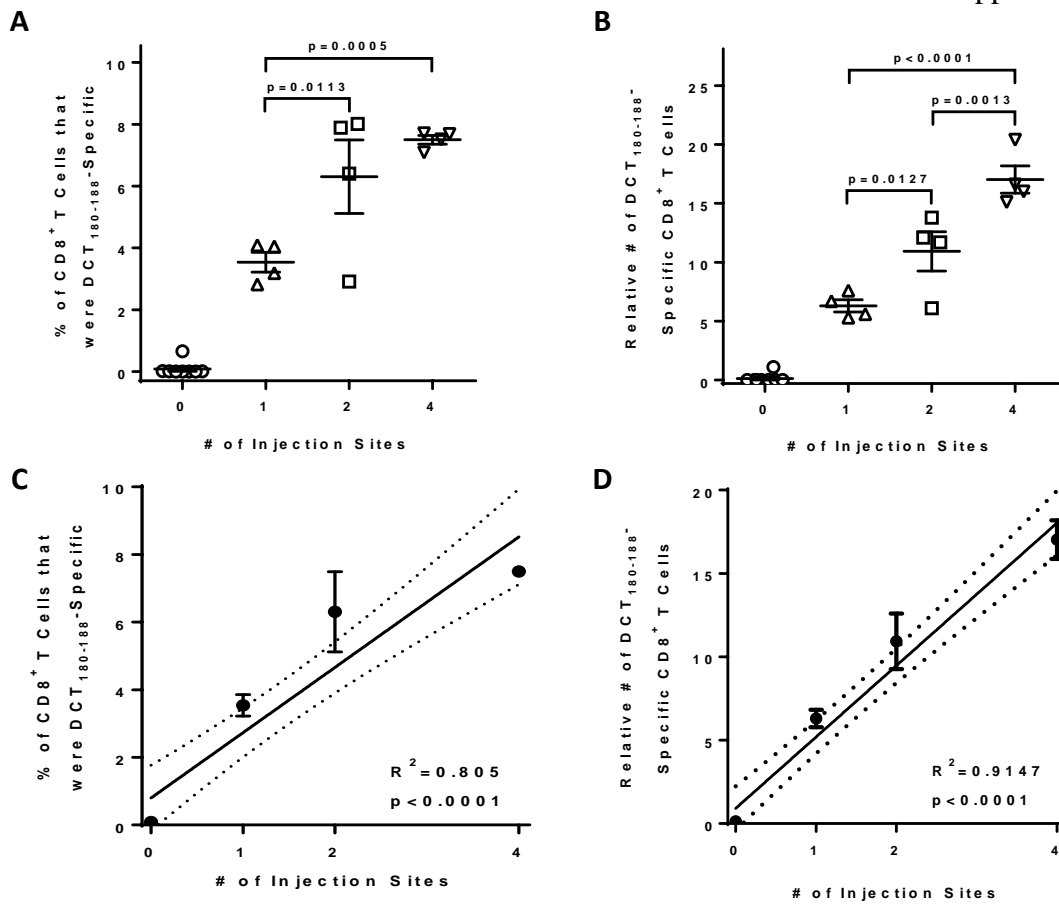

**Supplementary Figure 3: The magnitude of blood-derived CD8<sup>+</sup>T-cell responses correlates with the number of vaccination sites in tumor-bearing hosts.** C57BL/6 mice (n = 4 per group; one experimental replicate) with intradermal B16-F10 melanomas were either unvaccinated (0 injection sites) or vaccinated with a total of  $1 \times 10^8$  pfu of a recombinant human serotype 5 adenovirus expressing the melanoma-associated antigen dopachrome tautomerase, with injections spread across one (semitendinosus; left hind limb), two (semitendinosus of both hind limbs) or four (semitendinosus of both hind limbs and the triceps brachii of both forelimbs) sites. Fourteen days post-immunization blood-derived DCT<sub>180-188</sub>-specific CD8<sup>+</sup> T cells were quantified by flow cytometric detection of intracellular cytokines following *ex vivo* re-stimulation with peptides. The (A) frequency and (B) relative number (normalized based on blood volume) of DCT-specific T cells were assessed by one-way analysis of variance with Tukey's multiple comparison test. Strong, significant Pearson correlations were found between (C) frequency and (D) relative number of DCT-specific T cells and the number of vaccine injection sites. Means and standard errors are shown.

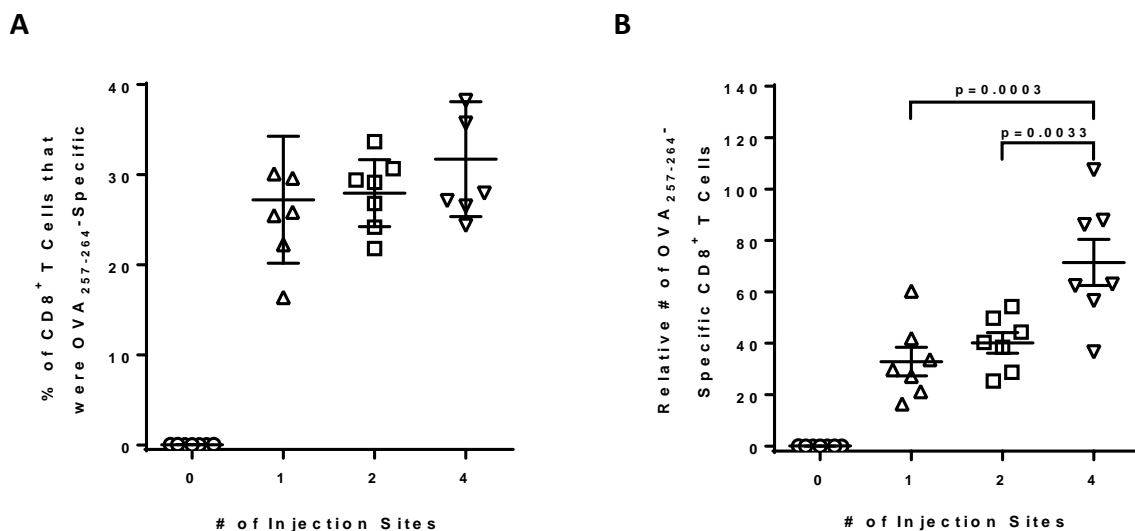

**Supplementary Figure 4: Multi-site vaccination can enhance the magnitude of T-cell responses to a foreign antigen.** Tumor-free C57BL/6 mice (n = 7 per group; pooled from two experimental replicates) were either unvaccinated (0 injection sites) or vaccinated with a total of  $1 \times 10^8$  pfu of a recombinant human serotype 5 adenovirus expressing the immunodominant epitope from chicken ovalbumin (OVA<sub>257-264</sub>), with injections spread across one (semitendinosus; left hind limb), two (semitendinosus of both hind limbs) or four (semitendinosus of both hind limbs and the triceps brachii of both forelimbs) sites. Fourteen days post-immunization blood-derived OVA<sub>257-264</sub>-specific CD8<sup>+</sup> T cells were quantified by flow cytometric detection of intracellular cytokines following *ex vivo* re-stimulation with peptides. The (A) frequency and (B) relative number (normalized based on blood volume) of DCT-specific T cells were assessed by one-way analysis of variance with Tukey's multiple comparison test. Means and standard errors are shown. Four-site vaccination was superior to both one- and two-site protocols with respect to the number of OVA-specific T cells that were induced.
